# Supplementary material for: Tumor Analyses Reveal Squamous Transformation and Off-Target Alterations As Early Resistance Mechanisms to First-line Osimertinib in EGFR -Mutant Lung Cancer
Source: Oxford University Press journal article supplement (doi:10.1158/1078-0432.ccr-19-3563), 2020-01-07
Supplement: 10780432ccr193563-sup-231571_1_supp_5925536_q1l6hm.docx [file 10780432ccr193563-sup-231571_1_supp_5925536_q1l6hm.docx]

**Supplemental Table 1.** MET amplification

| **Fold change** | **Copy number by FACETS** |
| --- | --- |
| 2.0 | 23x |
| 2.0 | 9x |
| 1.5 (10% tumor purity) | 5x |
| 4.0 | 8x |
